# Supplementary material for: J-Shaped Relationship of Serum Uric Acid with Unfavorable Short-Term Outcomes among Patients with Acute Ischemic Stroke
Source: MDPI journal article supplement (doi:10.3390/biomedicines10092185), 2022-09-04
Supplement: s1 [file s1]

**Table S1.** Comparison of measured variables with different quartiles of uric acid derived from each group among all patients, male and female patients

|                                    | Quartile 1 | Quartile 2 | Quartile 3 | Quartile 4 | <i>p</i> -Value |
|------------------------------------|------------|------------|------------|------------|-----------------|
| All patients ( <i>n</i> = 3370)    |            |            |            |            |                 |
| Uric acid (mg/dL)                  | <4.1       | 4.1-5.1    | 5.2-6.2    | >6.2       |                 |
| Number of patients                 | 889        | 847        | 811        | 823        |                 |
| Age (years)                        | 71.0±13.6  | 70.3±13.5  | 70.4±13.3  | 70.8±14.1  | 0.619           |
| Female gender                      | 510 (57)   | 386 (46)   | 280 (35)   | 269 (33)   | <0.001          |
| NIHSS score on admission           | 7.5±7.2    | 6.4±6.9    | 6.3±6.6    | 7.5±7.9    | <0.001          |
| mRS score >2 at discharge          | 510 (57)   | 386 (46)   | 280 (45)   | 403 (49)   | <0.001          |
| Death at discharge                 | 40 (4.5)   | 26 (3.1)   | 19 (2.3)   | 48 (5.8)   | 0.001           |
| Male patients ( <i>n</i> = 1925)   |            |            |            |            |                 |
| Uric acid (mg/dL)                  | <4.4       | 4.4-5.4    | 5.5-6.5    | >6.5       |                 |
| Number of patients                 | 453        | 585        | 435        | 452        |                 |
| Age (years)                        | 69.1±13.5  | 68.1±13.1  | 67.6±13.6  | 67.6±13.9  | 0.293           |
| NIHSS score on admission           | 6.0±6.1    | 5.8±6.1    | 5.6±6.2    | 6.9±7.5    | 0.009           |
| mRS score >2 at discharge          | 219 (48)   | 247 (42)   | 157 (36)   | 195 (43)   | 0.003           |
| Death at discharge                 | 25 (5.5)   | 15 (2.6)   | 7 (1.6)    | 21 (4.6)   | 0.003           |
| Female patients ( <i>n</i> = 1445) |            |            |            |            |                 |
| Uric acid (mg/dL)                  | <3.8       | 3.8-4.6    | 4.7-5.9    | >5.9       |                 |
| Number of patients                 | 356        | 347        | 399        | 343        |                 |
| Age (years)                        | 72.3±13.5  | 73.5±13.1  | 73.3±12.9  | 77.3±11.9  | <0.001          |
| NIHSS score on admission           | 8.8±8.0    | 7.8±7.6    | 7.3±7.3    | 8.9±8.4    | 0.004           |
| mRS score >2 at discharge          | 218 (61)   | 190 (55)   | 214 (54)   | 218 (64)   | 0.015           |
| Death at discharge                 | 9 (2.5)    | 16 (4.6)   | 15 (3.8)   | 25 (7.3)   | 0.020           |

data are expressed as mean ± standard deviation or n (%); mRS, modified Rankin Scale; NIHSS, National Institutes of Health Stroke Scale

**Table S2.** Multivariable analysis of factors influencing unfavorable outcomes (modified Rankin Scale score > 2) in 3370 patients with acute ischemic stroke including quartile distribution of uric acid derived from each group.

| Characteristics                      | All patients ( <i>n</i> = 3370) |                            | Male patients ( <i>n</i> = 1925) |                            | Female patients ( <i>n</i> = 1445) |                            |
|--------------------------------------|---------------------------------|----------------------------|----------------------------------|----------------------------|------------------------------------|----------------------------|
|                                      | OR (95% CI)                     | Model I<br><i>p</i> -Value | OR (95% CI)                      | Model I<br><i>p</i> -Value | OR (95% CI)                        | Model I<br><i>p</i> -Value |
| Age                                  | 1.051 (1.042-1.061)             | <0.001                     | 1.045 (1.033-1.057)              | <0.001                     | 1.054 (1.040-1.069)                | <0.001                     |
| Admission NIHSS score                | 1.422 (1.377-1.467)             | <0.001                     | 1.434 (1.377-1.493)              | <0.001                     | 1.409 (1.342-1.479)                | <0.001                     |
| Female gender                        | 1.200 (0.955-1.508)             | 0.110                      | -                                | -                          | -                                  | -                          |
| Hemoglobin                           | 0.952(0.899-1.008)              | 0.147                      | 0.923 (0.859-0.993)              | 0.031                      | 0.991 (0.997-1.001)                | 0.850                      |
| Platelet                             | 0.999 (0.998-1.001)             | 0.424                      | 1.000 (0.998-1.002)              | 0.777                      | 0.999 (0.997-1.001)                | 0.445                      |
| White blood cells                    | 1.058 (1.016-1.102)             | 0.005                      | -                                | -                          | 1.130 (1.059-1.206)                | <0.001                     |
| Glucose                              | 1.002 (1.001-1.004)             | 0.012                      | -                                | -                          | 1.003 (1.000-1.005)                | 0.043                      |
| Creatinine                           | 0.978 (0.862-1.110)             | 0.929                      | 0.891 (0.763-1.040)              | 0.143                      | 1.072 (0.926-1.241)                | 0.352                      |
| Cholesterol                          | 1.003 (1.001-1.006)             | 0.014                      | 1.004 (1.001-1.008)              | 0.018                      | 1.003 (0.999-1.007)                | 0.132                      |
| Triglyceride                         | 1.000 (0.999-1.001)             | 0.509                      | 1.001 (0.999-1.002)              | 0.361                      | 0.999 (0.997-1.002)                | 0.647                      |
| Hypertension                         | 1.024 (0.825-1.270)             | 0.657                      | -                                | -                          | 1.131 (0.799-1.601)                | 0.487                      |
| Diabetes mellitus                    | 1.147 (0.904-1.455)             | 0.309                      | 1.397 (1.081-1.805)              | 0.011                      | 1.026 (0.697-1.511)                | 0.896                      |
| Dyslipidemia                         | 0.837 (0.653-1.072)             | 0.218                      | 0.949 (0.689-1.306)              | 0.747                      | 0.778 (0.531-1.139)                | 0.196                      |
| Heart disease                        | 0.888 (0.711-1.110)             | 0.428                      | 0.985(0.744-1.304)               | 0.916                      | 0.848 (0.595-1.207)                | 0.359                      |
| Prior stroke                         | 1.574 (1.254-1.977)             | <0.001                     | 1.695 (1.285-2.235)              | <0.001                     | 1.506 (1.033-2.196)                | 0.033                      |
| Current smoker                       | 1.023 (0.787-1.328)             | 0.838                      | 1.054 (0.813-1.366)              | 0.691                      | 0.625 (0.290-1.344)                | 0.213                      |
| Alcohol consumption                  | 0.926 (0.618-1.388)             | 0.688                      | -                                | -                          | -                                  | -                          |
| History of cancer                    | 1.655 (1.139-2.405)             | 0.011                      | -                                | -                          | 1.920 (1.102-3.346)                | 0.021                      |
| Uremia                               | 1.492 (0.557-3.994)             | 0.670                      | 2.659 (0.767-9.219)              | 0.123                      | -                                  | -                          |
| Quartile 1 of uric acid <sup>a</sup> | 1.359 (1.068-1.730)             | 0.013                      | 1.413 (1.053-1.895)              | 0.021                      | 1.217 (0.832-1.781)                | 0.312                      |
| Quartile 4 of uric acid <sup>a</sup> | 0.972 (0.766-1.233)             | 0.815                      | 0.980 (0.718-1.339)              | 0.901                      | 1.001 (0.684-1.466)                | 0.994                      |

Model I: including uric acid quartiles 1 to 4, range of Quartiles 1 and 4 for all patients: <4.1 mg/dL and >6.2 mg/dL, for male patients: <4.4 mg/dL and >6.5 mg/dL, for female patients: <3.8 mg/dL and >5.9 mg/dL, respectively; <sup>a</sup>Using Quartiles 2 and 3 of uric acid as reference percentiles; CI, confidence interval; NIHSS, National Institutes of Health Stroke Scale; OR, odds ratio

**Table S3.** Multivariable analysis of factors influencing death in 3370 patients with acute ischemic stroke including quartile distribution of uric acid derived from each group.

| Characteristics                      | All patients ( <i>n</i> = 3370) |                            | Male patients ( <i>n</i> = 1925) |                            | Female patients ( <i>n</i> = 1445) |                            |
|--------------------------------------|---------------------------------|----------------------------|----------------------------------|----------------------------|------------------------------------|----------------------------|
|                                      | OR (95% CI)                     | Model I<br><i>p</i> -Value | OR (95% CI)                      | Model I<br><i>p</i> -Value | OR (95% CI)                        | Model I<br><i>p</i> -Value |
| Age                                  | 1.019 (1.001-1.036)             | 0.025                      | 1.023 (1.000-1.046)              | 0.047                      | 1.025 (0.996-1.054)                | 0.091                      |
| Admission NIHSS score                | 1.134 (1.111-1.157)             | <0.001                     | 1.165 (1.130-1.201)              | <0.001                     | 1.127 (1.093-1.162)                | <0.001                     |
| Hemoglobin                           | 0.952 (0.862-1.053)             | 0.360                      | 0.887 (0.772-1.020)              | 0.092                      | -                                  | -                          |
| Platelet                             | -                               | -                          | 1.001 (0.998-1.004)              | 0.532                      | -                                  | -                          |
| White blood cells                    | 1.110 (1.049-1.176)             | <0.001                     | 1.136 (1.040-1.241)              | 0.005                      | 1.088 (1.005-1.178)                | 0.038                      |
| Glucose                              | 1.002 (1.000-1.004)             | 0.078                      | -                                | -                          | 1.001 (0.998-1.004)                | 0.459                      |
| Creatinine                           | 1.064 (0.883-1.283)             | 0.472                      | -                                | -                          | 1.208 (1.028-1.420)                | 0.022                      |
| Triglyceride                         | -                               | -                          | 1.001 (0.997-1.004)              | 0.751                      | -                                  | -                          |
| Diabetes mellitus                    | -                               | -                          | -                                | -                          | 1.525 (0.821-2.832)                | 0.182                      |
| Heart disease                        | 1.844 (1.205-2.820)             | 0.004                      | 1.290 (0.700-2.377)              | 0.415                      | 2.356 (1.234-4.499)                | 0.009                      |
| History of cancer                    | 2.100 (1.114-3.958)             | 0.033                      | -                                | -                          | 2.120 (0.923-4.872)                | 0.077                      |
| Uremia                               | 1.410 (0.376-5.295)             | 0.669                      | -                                | -                          | -                                  | -                          |
| Quartile 1 of uric acid <sup>a</sup> | 1.474 (0.895-2.427)             | 0.127                      | 3.198 (1.595-6.411)              | 0.001                      | 0.490 (0.217-1.109)                | 0.087                      |
| Quartile 4 of uric acid <sup>a</sup> | 1.498 (0.942-2.381)             | 0.088                      | 1.610 (0.776-3.337)              | 0.201                      | 1.128 (0.604-2.110)                | 0.705                      |

Model I: including uric acid quartiles 1 to 4; range of Quartiles 1 and 4 for all patients: <4.1 mg/dL and >6.2 mg/dL, for male patients: <4.4 mg/dL and >6.5 mg/dL, for female patients: <3.8 mg/dL and >5.9 mg/dL, respectively; <sup>a</sup>Using Quartiles 2 and 3 of uric acid as reference percentiles; CI, confidence interval; NIHSS, National Institutes of Health Stroke Scale; OR, odds ratio
